# Supplementary material
Source: publisher figshare collection journal article supplement (https://acs.figshare.com/ndownloader/files/4403425)
Supplement: Supplementary file 1 [file 4403425]

data_global

# 1. SUBMISSION DETAILS

_publ_contact_author
;
;
_publ_contact_author_phone        ? 
_publ_contact_author_fax          ?
_publ_contact_author_email        ?
_publ_requested_journal           test
_publ_requested_coeditor_name     ?

_publ_contact_letter
;
;

#=============================================================================

# 3. TITLE AND AUTHOR LIST

_publ_section_title
;
;

loop_
 _publ_author_name
 _publ_author_address

     'Mutikainen Ilpo'
;     University of Helsinki
      Department of Chemistry 
      Laboratory of Inorganic Chemistry
      FIN-00014 Helsinki
      Finland
;


     'Turpeinen Urho'
;     University of Helsinki
      Department of Chemistry 
      Laboratory of Inorganic Chemistry
      FIN-00014 Helsinki
      Finland
;


#=============================================================================

# 4. TEXT

_publ_section_abstract
;

;
_publ_section_comment
;

;
_publ_section_experimental
;
All nonhydrogen atoms were refined anisotropically.
The sulfate ions were disordered. The oxygen O2 and O3 atoms bonded to the 
S1 atom were refined in three positions. The sulfate S2 and S3 atoms were
refined with population parameters 0.2553 and 0.1866, respectively. The O 
atoms of these sulfate ions were not located in the difference map due to the
high point symmetry and disorder and room temperature measurement. The high
temperature factors of some atoms are due to the disorder and room 
temperature data collection.
The H atoms of the partly populated O2 and O3 atoms were not located. The 
other H atoms were introduced in calculated positions and refined with fixed 
geometry with respect to their carrier atoms.   
;
_publ_section_references
;

Altomare, A., Burla, M.C., Camalli, M., Cascarano, G., Giacovazzo, C.,
Guagliardi, A., Moliterni, A.G.G., Polidori, G. & Spagna, R. (1999). 
J. Appl. Cryst 32, 115-119.

Nonius (2002). COLLECT. Nonius BV, Delft, The Netherlands.

Kottke, T. and Stalke, D. (1993). J. Appl. Crystallogr. 26, 615--619.

Sheldrick, G.M. (1990). SHELXTL. University of G\"ottingen, Germany.

Sheldrick, G.M. (1996). SADABS. University of G\"ottingen, Germany. 

Sheldrick, G.M. (1997). SHELX97. University of G\"ottingen, Germany.

;

_publ_section_figure_captions
;
;
_publ_section_acknowledgements
;

;


#=============================================================================

data_arpu1 
 
_audit_creation_method            SHELXL-97 
_chemical_name_systematic 
; 
 ? 
; 
_chemical_name_common             ? 
_chemical_melting_point           ? 
_chemical_formula_moiety          'C32 H28 Cl2 Si Zr'  
_chemical_formula_sum 
 'C32 H28 Cl2 Si Zr' 
_chemical_formula_weight          602.75 
 
loop_ 
 _atom_type_symbol 
 _atom_type_description 
 _atom_type_scat_dispersion_real 
 _atom_type_scat_dispersion_imag 
 _atom_type_scat_source 
 'C'  'C'   0.0033   0.0016 
 'International Tables Vol C Tables 4.2.6.8 and 6.1.1.4' 
 'H'  'H'   0.0000   0.0000 
 'International Tables Vol C Tables 4.2.6.8 and 6.1.1.4' 
 'Cl'  'Cl'   0.1484   0.1585 
 'International Tables Vol C Tables 4.2.6.8 and 6.1.1.4' 
 'Si'  'Si'   0.0817   0.0704 
 'International Tables Vol C Tables 4.2.6.8 and 6.1.1.4' 
 'Zr'  'Zr'  -2.9673   0.5597 
 'International Tables Vol C Tables 4.2.6.8 and 6.1.1.4' 
 
_symmetry_cell_setting            Triclinic 
_symmetry_space_group_name_H-M    'P -1'
 
loop_ 
 _symmetry_equiv_pos_as_xyz 
 'x, y, z' 
 '-x, -y, -z' 
 
_cell_length_a                    10.5424(7) 
_cell_length_b                    11.2813(8) 
_cell_length_c                    13.1506(10) 
_cell_angle_alpha                 95.893(3) 
_cell_angle_beta                  106.903(3) 
_cell_angle_gamma                 112.388(4) 
_cell_volume                      1342.80(17) 
_cell_formula_units_Z             2 
_cell_measurement_temperature     153(2) 
_cell_measurement_reflns_used     2.55 
_cell_measurement_theta_min       15.78
_cell_measurement_theta_max       148
 
_exptl_crystal_description        prism 
_exptl_crystal_colour             colorless
_exptl_crystal_size_max           0.20
_exptl_crystal_size_mid           0.20
_exptl_crystal_size_min           0.15
_exptl_crystal_density_meas       ? 
_exptl_crystal_density_diffrn     1.491 
_exptl_crystal_density_method     'not measured' 
_exptl_crystal_F_000              616 
_exptl_absorpt_coefficient_mu     0.673 
_exptl_absorpt_correction_type    'multi-scan' 
_exptl_absorpt_correction_T_min   0.766
_exptl_absorpt_correction_T_max   0.904
_exptl_absorpt_process_details    'SADABS (Sheldrick, 1996)' 
 
_exptl_special_details 
; 
 ? 
; 
 
_diffrn_ambient_temperature       153(2) 
_diffrn_radiation_wavelength      0.71073 
_diffrn_radiation_type            MoK\a 
_diffrn_radiation_source          'fine-focus sealed tube' 
_diffrn_radiation_monochromator   graphite 
_diffrn_measurement_device_type   kappaCCD
_diffrn_measurement_method        CCD
_diffrn_detector_area_resol_mean  ? 
_diffrn_standards_number          ? 
_diffrn_standards_interval_count  ? 
_diffrn_standards_interval_time   ? 
_diffrn_standards_decay_%         ? 
_diffrn_reflns_number             11917 
_diffrn_reflns_av_R_equivalents   0.0713 
_diffrn_reflns_av_sigmaI/netI     0.0745 
_diffrn_reflns_limit_h_min        -12 
_diffrn_reflns_limit_h_max        12 
_diffrn_reflns_limit_k_min        -13 
_diffrn_reflns_limit_k_max        13 
_diffrn_reflns_limit_l_min        -15 
_diffrn_reflns_limit_l_max        15 
_diffrn_reflns_theta_min          3.00 
_diffrn_reflns_theta_max          25.02 
_reflns_number_total              4681 
_reflns_number_gt                 3739 
_reflns_threshold_expression      >2sigma(I) 
 
 _computing_data_collection        'COLLECT (Nonius, 2002)' 
_computing_cell_refinement        'COLLECT (Nonius, 2002)' 
_computing_data_reduction         'COLLECT (Nonius, 2002)' 
_computing_structure_solution     'SHELXS97 (Sheldrick, 1990)' 
_computing_structure_refinement   'SHELXL97 (Sheldrick, 1997)' 
_computing_molecular_graphics     'SHELXTL (Sheldrick, 1990)' 
_computing_publication_material   'SHELXTL (Sheldrick, 1990)' 

_refine_special_details 
; 
 Refinement of F^2^ against ALL reflections.  The weighted R-factor wR and 
 goodness of fit S are based on F^2^, conventional R-factors R are based 
 on F, with F set to zero for negative F^2^. The threshold expression of 
 F^2^ > 2sigma(F^2^) is used only for calculating R-factors(gt) etc. and is 
 not relevant to the choice of reflections for refinement.  R-factors based 
 on F^2^ are statistically about twice as large as those based on F, and R- 
 factors based on ALL data will be even larger. 
; 
 
_refine_ls_structure_factor_coef  Fsqd  
_refine_ls_matrix_type            full 
_refine_ls_weighting_scheme       calc  
_refine_ls_weighting_details 
 'calc w=1/[\s^2^(Fo^2^)+(0.0588P)^2^+3.8718P] where P=(Fo^2^+2Fc^2^)/3' 
_atom_sites_solution_primary      direct 
_atom_sites_solution_secondary    difmap 
_atom_sites_solution_hydrogens    geom 
_refine_ls_hydrogen_treatment     constr
_refine_ls_extinction_method      none 
_refine_ls_extinction_coef        ? 
_refine_ls_number_reflns          4681 
_refine_ls_number_parameters      325 
_refine_ls_number_restraints      0 
_refine_ls_R_factor_all           0.0774 
_refine_ls_R_factor_gt            0.0578 
_refine_ls_wR_factor_ref          0.1494 
_refine_ls_wR_factor_gt           0.1366 
_refine_ls_goodness_of_fit_ref    1.059 
_refine_ls_restrained_S_all       1.059 
_refine_ls_shift/su_max           0.000 
_refine_ls_shift/su_mean          0.000 
 
loop_ 
 _atom_site_label 
 _atom_site_type_symbol 
 _atom_site_fract_x 
 _atom_site_fract_y 
 _atom_site_fract_z 
 _atom_site_U_iso_or_equiv 
 _atom_site_adp_type 
 _atom_site_occupancy 
 _atom_site_symetry_multiplicity 
 _atom_site_calc_flag 
 _atom_site_refinement_flags 
 _atom_site_disorder_assembly 
 _atom_site_disorder_group 
Zr1 Zr 0.39227(5) 0.20149(5) 0.21642(4) 0.02691(17) Uani 1 1 d . . . 
Cl1 Cl 0.16104(14) 0.07855(13) 0.24089(12) 0.0372(3) Uani 1 1 d . . . 
Cl2 Cl 0.55111(15) 0.27261(13) 0.40499(11) 0.0381(3) Uani 1 1 d . . . 
Si1 Si 0.42806(17) 0.23658(15) -0.02184(12) 0.0345(4) Uani 1 1 d . . . 
C1 C 0.4417(5) 0.1117(5) 0.0612(4) 0.0308(11) Uani 1 1 d . . . 
C2 C 0.3192(6) 0.0048(5) 0.0694(4) 0.0342(12) Uani 1 1 d . . . 
C3 C 0.3697(6) -0.0325(5) 0.1676(5) 0.0355(12) Uani 1 1 d . . . 
H3A H 0.3094 -0.1099 0.1906 0.043 Uiso 1 1 calc R . . 
C4 C 0.5226(5) 0.0446(5) 0.2197(4) 0.0319(12) Uani 1 1 d . . . 
C5 C 0.5674(6) 0.1354(5) 0.1561(4) 0.0327(12) Uani 1 1 d . . . 
C6 C 0.4057(6) 0.3421(5) 0.0859(4) 0.0310(11) Uani 1 1 d . . . 
C7 C 0.2658(6) 0.3106(5) 0.0980(4) 0.0310(11) Uani 1 1 d . . . 
H7A H 0.1688 0.2624 0.0366 0.037 Uiso 1 1 calc R . . 
C8 C 0.2849(6) 0.3757(5) 0.2028(4) 0.0313(11) Uani 1 1 d . . . 
C9 C 0.4387(6) 0.4544(5) 0.2582(4) 0.0314(11) Uani 1 1 d . . . 
C10 C 0.5132(6) 0.4334(5) 0.1863(4) 0.0307(11) Uani 1 1 d . . . 
C11 C 0.7189(6) 0.2282(5) 0.1917(5) 0.0353(12) Uani 1 1 d . . . 
H11A H 0.7506 0.2925 0.1520 0.042 Uiso 1 1 calc R . . 
C12 C 0.8159(6) 0.2229(6) 0.2824(5) 0.0392(13) Uani 1 1 d . . . 
H12A H 0.9159 0.2850 0.3050 0.047 Uiso 1 1 calc R . . 
C13 C 0.7767(6) 0.1291(5) 0.3462(5) 0.0348(12) Uani 1 1 d . . . 
C14 C 0.6277(5) 0.0385(5) 0.3167(4) 0.0312(11) Uani 1 1 d . . . 
C15 C 0.6685(6) 0.5000(5) 0.2249(5) 0.0376(13) Uani 1 1 d . . . 
H15A H 0.7207 0.4861 0.1805 0.045 Uiso 1 1 calc R . . 
C16 C 0.7432(6) 0.5847(6) 0.3269(5) 0.0443(14) Uani 1 1 d . . . 
H16A H 0.8474 0.6298 0.3522 0.053 Uiso 1 1 calc R . . 
C17 C 0.6686(6) 0.6065(5) 0.3952(5) 0.0420(14) Uani 1 1 d . . . 
H17A H 0.7236 0.6660 0.4654 0.050 Uiso 1 1 calc R . . 
C18 C 0.5192(6) 0.5439(5) 0.3626(5) 0.0369(12) Uani 1 1 d . . . 
H18A H 0.4702 0.5600 0.4089 0.044 Uiso 1 1 calc R . . 
C19 C 0.1639(6) 0.3691(5) 0.2441(4) 0.0327(12) Uani 1 1 d . . . 
H19A H 0.1926 0.3620 0.3211 0.039 Uiso 1 1 calc R . . 
H19B H 0.0739 0.2880 0.2005 0.039 Uiso 1 1 calc R . . 
C20 C 0.1290(5) 0.4877(5) 0.2383(5) 0.0327(12) Uani 1 1 d . . . 
C21 C 0.1881(7) 0.5905(6) 0.3285(6) 0.0550(18) Uani 1 1 d . . . 
H21A H 0.2506 0.5867 0.3954 0.066 Uiso 1 1 calc R . . 
C22 C 0.1586(8) 0.6996(7) 0.3241(8) 0.072(2) Uani 1 1 d . . . 
H22A H 0.2041 0.7714 0.3868 0.086 Uiso 1 1 calc R . . 
C23 C 0.0651(8) 0.7047(7) 0.2308(8) 0.064(2) Uani 1 1 d . . . 
H23A H 0.0455 0.7800 0.2279 0.077 Uiso 1 1 calc R . . 
C24 C -0.0013(8) 0.6008(8) 0.1405(6) 0.0567(18) Uani 1 1 d . . . 
H24A H -0.0702 0.6021 0.0759 0.068 Uiso 1 1 calc R . . 
C25 C 0.0329(6) 0.4932(6) 0.1441(5) 0.0396(13) Uani 1 1 d . . . 
H25A H -0.0107 0.4226 0.0807 0.048 Uiso 1 1 calc R . . 
C26 C 0.2608(7) 0.1681(6) -0.1485(5) 0.0491(15) Uani 1 1 d . . . 
H26A H 0.2605 0.2376 -0.1875 0.074 Uiso 1 1 calc R . . 
H26B H 0.1729 0.1355 -0.1288 0.074 Uiso 1 1 calc R . . 
H26C H 0.2610 0.0952 -0.1958 0.074 Uiso 1 1 calc R . . 
C27 C 0.5922(7) 0.3235(6) -0.0580(5) 0.0462(15) Uani 1 1 d . . . 
H27A H 0.5758 0.3860 -0.1008 0.069 Uiso 1 1 calc R . . 
H27B H 0.6088 0.2588 -0.1015 0.069 Uiso 1 1 calc R . . 
H27C H 0.6786 0.3716 0.0091 0.069 Uiso 1 1 calc R . . 
C28 C 0.1627(6) -0.0631(6) -0.0078(5) 0.0422(14) Uani 1 1 d . . . 
H28A H 0.1501 -0.1382 -0.0608 0.063 Uiso 1 1 calc R . . 
H28B H 0.1378 -0.0008 -0.0467 0.063 Uiso 1 1 calc R . . 
H28C H 0.0979 -0.0947 0.0335 0.063 Uiso 1 1 calc R . . 
C29 C 0.8808(6) 0.1218(6) 0.4364(5) 0.0419(14) Uani 1 1 d . . . 
H29A H 0.9815 0.1806 0.4560 0.050 Uiso 1 1 calc R . . 
C30 C 0.8416(7) 0.0322(6) 0.4975(5) 0.0450(14) Uani 1 1 d . . . 
H30A H 0.9146 0.0292 0.5584 0.054 Uiso 1 1 calc R . . 
C31 C 0.6954(7) -0.0538(6) 0.4703(5) 0.0426(14) Uani 1 1 d . . . 
H31A H 0.6681 -0.1144 0.5137 0.051 Uiso 1 1 calc R . . 
C32 C 0.5888(6) -0.0522(6) 0.3801(5) 0.0399(13) Uani 1 1 d . . . 
H32A H 0.4889 -0.1127 0.3611 0.048 Uiso 1 1 calc R . . 
 
loop_ 
 _atom_site_aniso_label 
 _atom_site_aniso_U_11 
 _atom_site_aniso_U_22 
 _atom_site_aniso_U_33 
 _atom_site_aniso_U_23 
 _atom_site_aniso_U_13 
 _atom_site_aniso_U_12 
Zr1 0.0247(3) 0.0262(3) 0.0283(3) 0.0049(2) 0.0078(2) 0.0111(2) 
Cl1 0.0294(6) 0.0367(7) 0.0473(8) 0.0136(6) 0.0159(6) 0.0137(6) 
Cl2 0.0384(7) 0.0408(7) 0.0299(7) 0.0026(6) 0.0037(6) 0.0194(6) 
Si1 0.0423(8) 0.0360(8) 0.0313(8) 0.0077(6) 0.0153(7) 0.0216(7) 
C1 0.028(3) 0.028(3) 0.032(3) 0.002(2) 0.009(2) 0.011(2) 
C2 0.036(3) 0.028(3) 0.036(3) -0.004(2) 0.012(2) 0.015(2) 
C3 0.043(3) 0.023(3) 0.041(3) 0.009(2) 0.015(3) 0.015(2) 
C4 0.027(3) 0.031(3) 0.041(3) 0.005(2) 0.012(2) 0.018(2) 
C5 0.037(3) 0.030(3) 0.038(3) 0.007(2) 0.018(2) 0.018(2) 
C6 0.032(3) 0.029(3) 0.038(3) 0.012(2) 0.014(2) 0.016(2) 
C7 0.033(3) 0.031(3) 0.029(3) 0.006(2) 0.008(2) 0.017(2) 
C8 0.034(3) 0.032(3) 0.035(3) 0.012(2) 0.016(2) 0.019(2) 
C9 0.033(3) 0.024(3) 0.036(3) 0.009(2) 0.012(2) 0.012(2) 
C10 0.037(3) 0.027(3) 0.035(3) 0.010(2) 0.015(2) 0.017(2) 
C11 0.036(3) 0.033(3) 0.046(3) 0.012(2) 0.022(3) 0.017(2) 
C12 0.026(3) 0.042(3) 0.049(4) 0.009(3) 0.015(3) 0.013(2) 
C13 0.029(3) 0.039(3) 0.040(3) 0.006(2) 0.012(2) 0.020(2) 
C14 0.028(3) 0.034(3) 0.032(3) 0.006(2) 0.008(2) 0.016(2) 
C15 0.030(3) 0.032(3) 0.053(4) 0.008(3) 0.020(3) 0.013(2) 
C16 0.030(3) 0.037(3) 0.058(4) 0.005(3) 0.013(3) 0.010(3) 
C17 0.037(3) 0.029(3) 0.046(3) -0.005(2) 0.008(3) 0.010(2) 
C18 0.038(3) 0.031(3) 0.039(3) 0.004(2) 0.012(3) 0.016(2) 
C19 0.030(3) 0.032(3) 0.035(3) 0.005(2) 0.013(2) 0.013(2) 
C20 0.025(2) 0.032(3) 0.041(3) 0.003(2) 0.013(2) 0.013(2) 
C21 0.042(3) 0.054(4) 0.055(4) -0.014(3) -0.002(3) 0.027(3) 
C22 0.044(4) 0.046(4) 0.104(7) -0.026(4) 0.012(4) 0.020(3) 
C23 0.051(4) 0.040(4) 0.118(7) 0.028(4) 0.047(5) 0.023(3) 
C24 0.061(4) 0.076(5) 0.065(5) 0.038(4) 0.036(4) 0.046(4) 
C25 0.043(3) 0.052(3) 0.032(3) 0.011(3) 0.016(3) 0.027(3) 
C26 0.062(4) 0.055(4) 0.033(3) 0.009(3) 0.010(3) 0.033(3) 
C27 0.063(4) 0.051(4) 0.044(4) 0.018(3) 0.028(3) 0.035(3) 
C28 0.034(3) 0.044(3) 0.038(3) -0.001(3) 0.004(3) 0.015(3) 
C29 0.031(3) 0.052(4) 0.045(3) 0.005(3) 0.012(3) 0.022(3) 
C30 0.044(3) 0.055(4) 0.044(4) 0.014(3) 0.012(3) 0.030(3) 
C31 0.055(4) 0.044(3) 0.043(3) 0.016(3) 0.020(3) 0.033(3) 
C32 0.040(3) 0.035(3) 0.050(4) 0.014(3) 0.019(3) 0.019(3) 
 
_geom_special_details 
; 
 All esds (except the esd in the dihedral angle between two l.s. planes) 
 are estimated using the full covariance matrix.  The cell esds are taken 
 into account individually in the estimation of esds in distances, angles 
 and torsion angles; correlations between esds in cell parameters are only 
 used when they are defined by crystal symmetry.  An approximate (isotropic) 
 treatment of cell esds is used for estimating esds involving l.s. planes. 
; 
 
loop_ 
 _geom_bond_atom_site_label_1 
 _geom_bond_atom_site_label_2 
 _geom_bond_distance 
 _geom_bond_site_symmetry_2 
 _geom_bond_publ_flag 
Zr1 Cl2 2.3981(14) . ? 
Zr1 Cl1 2.4376(13) . ? 
Zr1 C6 2.452(5) . ? 
Zr1 C1 2.462(5) . ? 
Zr1 C7 2.481(5) . ? 
Zr1 C2 2.491(5) . ? 
Zr1 C5 2.524(5) . ? 
Zr1 C3 2.554(5) . ? 
Zr1 C10 2.568(5) . ? 
Zr1 C8 2.613(5) . ? 
Zr1 C4 2.618(5) . ? 
Zr1 C9 2.672(5) . ? 
Si1 C27 1.862(6) . ? 
Si1 C26 1.863(6) . ? 
Si1 C6 1.882(5) . ? 
Si1 C1 1.891(5) . ? 
C1 C2 1.434(7) . ? 
C1 C5 1.444(7) . ? 
C2 C3 1.418(8) . ? 
C2 C28 1.498(7) . ? 
C3 C4 1.411(7) . ? 
C3 H3A 1.0000 . ? 
C4 C5 1.417(7) . ? 
C4 C14 1.454(7) . ? 
C5 C11 1.435(7) . ? 
C6 C10 1.432(7) . ? 
C6 C7 1.441(7) . ? 
C7 C8 1.413(7) . ? 
C7 H7A 1.0000 . ? 
C8 C9 1.425(7) . ? 
C8 C19 1.505(7) . ? 
C9 C18 1.417(8) . ? 
C9 C10 1.448(7) . ? 
C10 C15 1.415(7) . ? 
C11 C12 1.350(8) . ? 
C11 H11A 0.9500 . ? 
C12 C13 1.430(8) . ? 
C12 H12A 0.9500 . ? 
C13 C29 1.397(8) . ? 
C13 C14 1.416(7) . ? 
C14 C32 1.401(8) . ? 
C15 C16 1.372(8) . ? 
C15 H15A 0.9500 . ? 
C16 C17 1.414(8) . ? 
C16 H16A 0.9500 . ? 
C17 C18 1.364(8) . ? 
C17 H17A 0.9500 . ? 
C18 H18A 0.9500 . ? 
C19 C20 1.520(7) . ? 
C19 H19A 0.9900 . ? 
C19 H19B 0.9900 . ? 
C20 C21 1.370(8) . ? 
C20 C25 1.378(8) . ? 
C21 C22 1.383(10) . ? 
C21 H21A 0.9500 . ? 
C22 C23 1.354(11) . ? 
C22 H22A 0.9500 . ? 
C23 C24 1.371(11) . ? 
C23 H23A 0.9500 . ? 
C24 C25 1.393(9) . ? 
C24 H24A 0.9500 . ? 
C25 H25A 0.9500 . ? 
C26 H26A 0.9800 . ? 
C26 H26B 0.9800 . ? 
C26 H26C 0.9800 . ? 
C27 H27A 0.9800 . ? 
C27 H27B 0.9800 . ? 
C27 H27C 0.9800 . ? 
C28 H28A 0.9800 . ? 
C28 H28B 0.9800 . ? 
C28 H28C 0.9800 . ? 
C29 C30 1.371(9) . ? 
C29 H29A 0.9500 . ? 
C30 C31 1.383(9) . ? 
C30 H30A 0.9500 . ? 
C31 C32 1.384(8) . ? 
C31 H31A 0.9500 . ? 
C32 H32A 0.9500 . ? 
 
loop_ 
 _geom_angle_atom_site_label_1 
 _geom_angle_atom_site_label_2 
 _geom_angle_atom_site_label_3 
 _geom_angle 
 _geom_angle_site_symmetry_1 
 _geom_angle_site_symmetry_3 
 _geom_angle_publ_flag 
Cl2 Zr1 Cl1 98.26(5) . . ? 
Cl2 Zr1 C6 124.49(13) . . ? 
Cl1 Zr1 C6 120.99(12) . . ? 
Cl2 Zr1 C1 126.02(13) . . ? 
Cl1 Zr1 C1 119.34(12) . . ? 
C6 Zr1 C1 68.53(17) . . ? 
Cl2 Zr1 C7 131.61(13) . . ? 
Cl1 Zr1 C7 87.74(13) . . ? 
C6 Zr1 C7 33.96(17) . . ? 
C1 Zr1 C7 89.81(17) . . ? 
Cl2 Zr1 C2 131.94(14) . . ? 
Cl1 Zr1 C2 86.55(13) . . ? 
C6 Zr1 C2 91.01(18) . . ? 
C1 Zr1 C2 33.65(17) . . ? 
C7 Zr1 C2 96.21(18) . . ? 
Cl2 Zr1 C5 92.38(13) . . ? 
Cl1 Zr1 C5 133.84(12) . . ? 
C6 Zr1 C5 87.07(17) . . ? 
C1 Zr1 C5 33.65(17) . . ? 
C7 Zr1 C5 117.36(17) . . ? 
C2 Zr1 C5 54.64(17) . . ? 
Cl2 Zr1 C3 100.75(13) . . ? 
Cl1 Zr1 C3 80.56(13) . . ? 
C6 Zr1 C3 121.67(18) . . ? 
C1 Zr1 C3 54.76(18) . . ? 
C7 Zr1 C3 127.53(17) . . ? 
C2 Zr1 C3 32.62(18) . . ? 
C5 Zr1 C3 53.31(17) . . ? 
Cl2 Zr1 C10 91.54(12) . . ? 
Cl1 Zr1 C10 133.45(12) . . ? 
C6 Zr1 C10 33.04(17) . . ? 
C1 Zr1 C10 88.91(17) . . ? 
C7 Zr1 C10 53.82(17) . . ? 
C2 Zr1 C10 119.19(18) . . ? 
C5 Zr1 C10 90.62(17) . . ? 
C3 Zr1 C10 141.91(17) . . ? 
Cl2 Zr1 C8 101.54(12) . . ? 
Cl1 Zr1 C8 80.14(12) . . ? 
C6 Zr1 C8 55.13(16) . . ? 
C1 Zr1 C8 120.78(17) . . ? 
C7 Zr1 C8 32.09(16) . . ? 
C2 Zr1 C8 126.27(18) . . ? 
C5 Zr1 C8 141.13(16) . . ? 
C3 Zr1 C8 152.29(17) . . ? 
C10 Zr1 C8 53.31(16) . . ? 
Cl2 Zr1 C4 79.62(12) . . ? 
Cl1 Zr1 C4 106.67(12) . . ? 
C6 Zr1 C4 118.43(17) . . ? 
C1 Zr1 C4 54.49(17) . . ? 
C7 Zr1 C4 144.22(17) . . ? 
C2 Zr1 C4 53.62(17) . . ? 
C5 Zr1 C4 31.93(16) . . ? 
C3 Zr1 C4 31.63(17) . . ? 
C10 Zr1 C4 119.86(16) . . ? 
C8 Zr1 C4 172.93(16) . . ? 
Cl2 Zr1 C9 80.02(12) . . ? 
Cl1 Zr1 C9 105.46(12) . . ? 
C6 Zr1 C9 54.15(17) . . ? 
C1 Zr1 C9 119.83(17) . . ? 
C7 Zr1 C9 52.41(16) . . ? 
C2 Zr1 C9 144.67(18) . . ? 
C5 Zr1 C9 120.62(16) . . ? 
C3 Zr1 C9 173.81(17) . . ? 
C10 Zr1 C9 32.01(16) . . ? 
C8 Zr1 C9 31.26(16) . . ? 
C4 Zr1 C9 143.94(16) . . ? 
C27 Si1 C26 108.9(3) . . ? 
C27 Si1 C6 114.3(3) . . ? 
C26 Si1 C6 110.1(3) . . ? 
C27 Si1 C1 115.0(3) . . ? 
C26 Si1 C1 113.6(3) . . ? 
C6 Si1 C1 94.3(2) . . ? 
C2 C1 C5 106.2(5) . . ? 
C2 C1 Si1 125.2(4) . . ? 
C5 C1 Si1 124.6(4) . . ? 
C2 C1 Zr1 74.3(3) . . ? 
C5 C1 Zr1 75.5(3) . . ? 
Si1 C1 Zr1 98.1(2) . . ? 
C3 C2 C1 108.1(5) . . ? 
C3 C2 C28 122.5(5) . . ? 
C1 C2 C28 129.4(5) . . ? 
C3 C2 Zr1 76.1(3) . . ? 
C1 C2 Zr1 72.1(3) . . ? 
C28 C2 Zr1 118.4(4) . . ? 
C4 C3 C2 109.3(5) . . ? 
C4 C3 Zr1 76.7(3) . . ? 
C2 C3 Zr1 71.2(3) . . ? 
C4 C3 H3A 125.1 . . ? 
C2 C3 H3A 125.1 . . ? 
Zr1 C3 H3A 125.1 . . ? 
C3 C4 C5 107.3(5) . . ? 
C3 C4 C14 131.0(5) . . ? 
C5 C4 C14 121.6(5) . . ? 
C3 C4 Zr1 71.7(3) . . ? 
C5 C4 Zr1 70.4(3) . . ? 
C14 C4 Zr1 125.1(4) . . ? 
C4 C5 C11 119.1(5) . . ? 
C4 C5 C1 109.0(4) . . ? 
C11 C5 C1 131.8(5) . . ? 
C4 C5 Zr1 77.7(3) . . ? 
C11 C5 Zr1 119.0(4) . . ? 
C1 C5 Zr1 70.8(3) . . ? 
C10 C6 C7 105.5(5) . . ? 
C10 C6 Si1 129.7(4) . . ? 
C7 C6 Si1 122.0(4) . . ? 
C10 C6 Zr1 77.9(3) . . ? 
C7 C6 Zr1 74.1(3) . . ? 
Si1 C6 Zr1 98.7(2) . . ? 
C8 C7 C6 110.7(5) . . ? 
C8 C7 Zr1 79.1(3) . . ? 
C6 C7 Zr1 71.9(3) . . ? 
C8 C7 H7A 124.2 . . ? 
C6 C7 H7A 124.2 . . ? 
Zr1 C7 H7A 124.2 . . ? 
C7 C8 C9 107.0(4) . . ? 
C7 C8 C19 125.9(5) . . ? 
C9 C8 C19 126.9(5) . . ? 
C7 C8 Zr1 68.8(3) . . ? 
C9 C8 Zr1 76.7(3) . . ? 
C19 C8 Zr1 122.7(3) . . ? 
C18 C9 C8 131.4(5) . . ? 
C18 C9 C10 120.6(5) . . ? 
C8 C9 C10 108.0(5) . . ? 
C18 C9 Zr1 124.6(4) . . ? 
C8 C9 Zr1 72.1(3) . . ? 
C10 C9 Zr1 70.0(3) . . ? 
C15 C10 C6 133.0(5) . . ? 
C15 C10 C9 118.3(5) . . ? 
C6 C10 C9 108.7(4) . . ? 
C15 C10 Zr1 118.8(4) . . ? 
C6 C10 Zr1 69.0(3) . . ? 
C9 C10 Zr1 78.0(3) . . ? 
C12 C11 C5 119.0(5) . . ? 
C12 C11 H11A 120.5 . . ? 
C5 C11 H11A 120.5 . . ? 
C11 C12 C13 123.7(5) . . ? 
C11 C12 H12A 118.1 . . ? 
C13 C12 H12A 118.1 . . ? 
C29 C13 C14 118.2(5) . . ? 
C29 C13 C12 122.4(5) . . ? 
C14 C13 C12 119.4(5) . . ? 
C32 C14 C13 119.5(5) . . ? 
C32 C14 C4 123.5(5) . . ? 
C13 C14 C4 117.0(5) . . ? 
C16 C15 C10 119.6(5) . . ? 
C16 C15 H15A 120.2 . . ? 
C10 C15 H15A 120.2 . . ? 
C15 C16 C17 121.4(5) . . ? 
C15 C16 H16A 119.3 . . ? 
C17 C16 H16A 119.3 . . ? 
C18 C17 C16 121.4(5) . . ? 
C18 C17 H17A 119.3 . . ? 
C16 C17 H17A 119.3 . . ? 
C17 C18 C9 118.7(5) . . ? 
C17 C18 H18A 120.7 . . ? 
C9 C18 H18A 120.7 . . ? 
C8 C19 C20 113.8(4) . . ? 
C8 C19 H19A 108.8 . . ? 
C20 C19 H19A 108.8 . . ? 
C8 C19 H19B 108.8 . . ? 
C20 C19 H19B 108.8 . . ? 
H19A C19 H19B 107.7 . . ? 
C21 C20 C25 117.9(5) . . ? 
C21 C20 C19 120.7(5) . . ? 
C25 C20 C19 121.4(5) . . ? 
C20 C21 C22 121.3(7) . . ? 
C20 C21 H21A 119.3 . . ? 
C22 C21 H21A 119.3 . . ? 
C23 C22 C21 120.3(7) . . ? 
C23 C22 H22A 119.9 . . ? 
C21 C22 H22A 119.9 . . ? 
C22 C23 C24 119.9(7) . . ? 
C22 C23 H23A 120.1 . . ? 
C24 C23 H23A 120.1 . . ? 
C23 C24 C25 119.6(7) . . ? 
C23 C24 H24A 120.2 . . ? 
C25 C24 H24A 120.2 . . ? 
C20 C25 C24 120.9(6) . . ? 
C20 C25 H25A 119.5 . . ? 
C24 C25 H25A 119.5 . . ? 
Si1 C26 H26A 109.5 . . ? 
Si1 C26 H26B 109.5 . . ? 
H26A C26 H26B 109.5 . . ? 
Si1 C26 H26C 109.5 . . ? 
H26A C26 H26C 109.5 . . ? 
H26B C26 H26C 109.5 . . ? 
Si1 C27 H27A 109.5 . . ? 
Si1 C27 H27B 109.5 . . ? 
H27A C27 H27B 109.5 . . ? 
Si1 C27 H27C 109.5 . . ? 
H27A C27 H27C 109.5 . . ? 
H27B C27 H27C 109.5 . . ? 
C2 C28 H28A 109.5 . . ? 
C2 C28 H28B 109.5 . . ? 
H28A C28 H28B 109.5 . . ? 
C2 C28 H28C 109.5 . . ? 
H28A C28 H28C 109.5 . . ? 
H28B C28 H28C 109.5 . . ? 
C30 C29 C13 121.8(5) . . ? 
C30 C29 H29A 119.1 . . ? 
C13 C29 H29A 119.1 . . ? 
C29 C30 C31 119.9(6) . . ? 
C29 C30 H30A 120.1 . . ? 
C31 C30 H30A 120.1 . . ? 
C30 C31 C32 120.4(6) . . ? 
C30 C31 H31A 119.8 . . ? 
C32 C31 H31A 119.8 . . ? 
C31 C32 C14 120.3(5) . . ? 
C31 C32 H32A 119.9 . . ? 
C14 C32 H32A 119.9 . . ? 
 
_diffrn_measured_fraction_theta_max    0.984 
_diffrn_reflns_theta_full              25.02 
_diffrn_measured_fraction_theta_full   0.984 
_refine_diff_density_max    1.221 
_refine_diff_density_min   -0.586 
_refine_diff_density_rms    0.110 
